# Supplementary material
Source: PubMed Central journal article supplement (PMC2724732)
Supplement: supp_122_3_345__2.pdf [file supp_122_3_345__2.pdf]

Table S2. Statistical comparison of noise-strength values

| Comparison ID# | Condition 1 | Condition 2 | FISH noise strength pairwise comparison | GFP-GR array loading noise strength pairwise comparison | Ch Protein array loading noise strength pairwise comparison |
|----------------|-------------|-------------|-----------------------------------------|---------------------------------------------------------|-------------------------------------------------------------|
| 1              | 3617 0h     | 3617 0.5h   | $P<0.05$                                | $P<0.05$                                                |                                                             |
| 2              | 3617 0h     | 3617 4h     | $P<0.05$                                | $P<0.05$                                                |                                                             |
| 3              | 3617 0h     | 6643 0h     | Not Significant                         | Not Significant                                         |                                                             |
| 4              | 3617 0h     | 6643 0.5h   | $P<0.05$                                | $P<0.05$                                                |                                                             |
| 5              | 3617 0h     | 6643 4h     | $P<0.05$                                | $P<0.05$                                                |                                                             |
| 6              | 3617 0h     | 6790 0h     | Not Significant                         | Not Significant                                         |                                                             |
| 7              | 3617 0h     | 6790 0.5h   | $P<0.05$                                | $P<0.05$                                                |                                                             |
| 8              | 3617 0h     | 6790 4h     | Not Significant                         | $P<0.05$                                                |                                                             |
| 9              | 3617 0.5h   | 3617 4h     | $P<0.05$                                | $P<0.05$                                                |                                                             |
| 10             | 3617 0.5h   | 6643 0h     | $P<0.05$                                | $P<0.05$                                                |                                                             |
| 11             | 3617 0.5h   | 6643 0.5h   | Not Significant                         | Not Significant                                         |                                                             |
| 12             | 3617 0.5h   | 6643 4h     | Not Significant                         | Not Significant                                         |                                                             |
| 13             | 3617 0.5h   | 6790 0h     | $P<0.05$                                | $P<0.05$                                                |                                                             |
| 14             | 3617 0.5h   | 6790 0.5h   | Not Significant                         | $P<0.05$                                                |                                                             |
| 15             | 3617 0.5h   | 6790 4h     | $P<0.05$                                | $P<0.05$                                                |                                                             |
| 16             | 3617 4h     | 6643 0h     | $P<0.05$                                | $P<0.05$                                                |                                                             |
| 17             | 3617 4h     | 6643 0.5h   | $P<0.05$                                | $P<0.05$                                                |                                                             |
| 18             | 3617 4h     | 6643 4h     | Not Significant                         | $P<0.05$                                                |                                                             |
| 19             | 3617 4h     | 6790 0h     | $P<0.05$                                | $P<0.05$                                                |                                                             |
| 20             | 3617 4h     | 6790 0.5h   | $P<0.05$                                | Not Significant                                         |                                                             |
| 21             | 3617 4h     | 6790 4h     | Not Significant                         | $P<0.05$                                                |                                                             |
| 22             | 6643 0h     | 6643 0.5h   | $P<0.05$                                | $P<0.05$                                                | Not Significant                                             |
| 23             | 6643 0h     | 6643 4h     | $P<0.05$                                | $P<0.05$                                                | Not Significant                                             |
| 24             | 6643 0h     | 6790 0h     | Not Significant                         | Not Significant                                         | $P<0.05$                                                    |
| 25             | 6643 0h     | 6790 0.5h   | $P<0.05$                                | $P<0.05$                                                | $P<0.05$                                                    |
| 26             | 6643 0h     | 6790 4h     | $P<0.05$                                | $P<0.05$                                                | $P<0.05$                                                    |
| 27             | 6643 0.5h   | 6643 4h     | Not Significant                         | Not Significant                                         | Not Significant                                             |
| 28             | 6643 0.5h   | 6790 0h     | $P<0.05$                                | $P<0.05$                                                | $P<0.05$                                                    |
| 29             | 6643 0.5h   | 6790 0.5h   | Not Significant                         | $P<0.05$                                                | $P<0.05$                                                    |
| 30             | 6643 0.5h   | 6790 4h     | $P<0.05$                                | $P<0.05$                                                | $P<0.05$                                                    |
| 31             | 6643 4h     | 6790 0h     | $P<0.05$                                | $P<0.05$                                                | $P<0.05$                                                    |
| 32             | 6643 4h     | 6790 0.5h   | Not Significant                         | $P<0.05$                                                | $P<0.05$                                                    |
| 33             | 6643 4h     | 6790 4h     | Not Significant                         | $P<0.05$                                                | $P<0.05$                                                    |
| 34             | 6790 0h     | 6790 0.5h   | $P<0.05$                                | $P<0.05$                                                | Not Significant                                             |
| 35             | 6790 0h     | 6790 4h     | $P<0.05$                                | $P<0.05$                                                | Not Significant                                             |
| 36             | 6790 0.5h   | 6790 4h     | Not Significant                         | Not Significant                                         | Not Significant                                             |
